# Supplementary material for: Enhancing molten salt oxidation sustainability: thermodynamic insights for spent salt reuse and carbonate cycle replenishment
Source: Royal Society of Chemistry journal article supplement (doi:10.1039/d4gc02789b), 2024-01-01
Supplement: d4gc02789b1.pdf [file d4gc02789b1.pdf]

**Supplementary Material**  
**for**  
**Enhancing Molten Salt Oxidation Sustainability: Thermodynamic**  
**Insights for Spent Salt Reuse and Carbonate Cycle Replenishment**

Qingguo Zhang <sup>a</sup>, Yongde Yan <sup>a, b\*</sup>, Yun Xue <sup>a, b</sup>, Fuqiu Ma <sup>a, b</sup>, Guanqing Hu <sup>a</sup>, Yuelin Wang <sup>a</sup>,  
Jingping Wang <sup>a\*</sup>, Milin Zhang <sup>a</sup>

<sup>a</sup>*College of Materials Science and Chemical Engineering, Harbin Engineering University, Harbin  
150001, Harbin, China*

<sup>b</sup>*Yantai Research Institute, Harbin Engineering University, Yantai 264006, Shandong, China*

*\*Corresponding author contact information:*

*Email: [y5d2006@hrbeu.edu.cn](mailto:y5d2006@hrbeu.edu.cn)*

*wangjingping@hrbeu.edu.cn*

## Supporting Figures

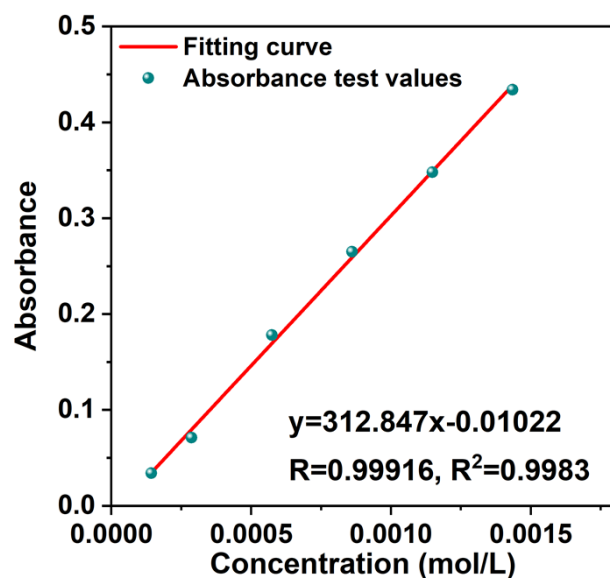

**Fig. S1.** The relation equation between standard solution concentrations and absorbance.

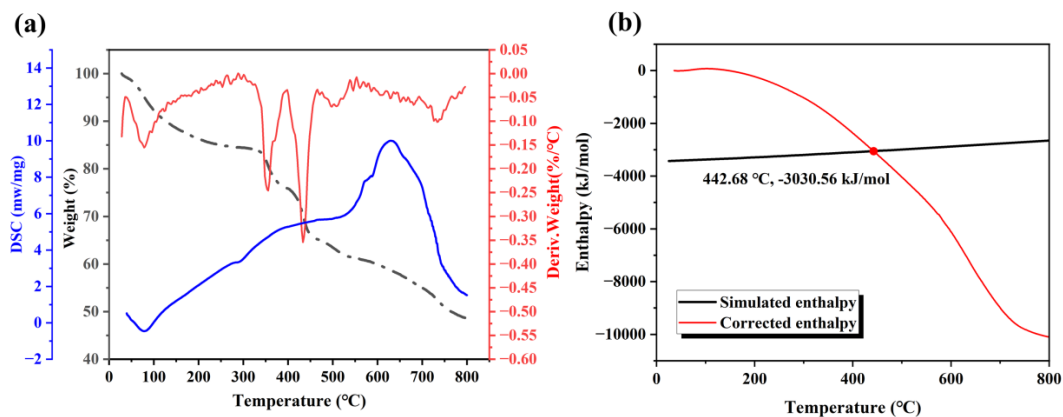

**Fig. S2.** (a) TG-DSC and (b) reaction enthalpy of CERs oxidized without carbonate process at 10 °C/min rate.

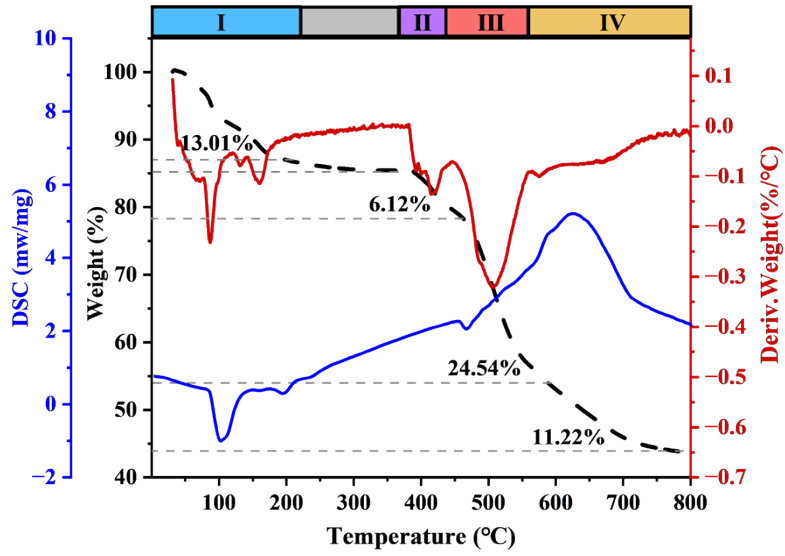

**Fig. S3.** TG-DSC curves and oxidation stage division of MSO process.

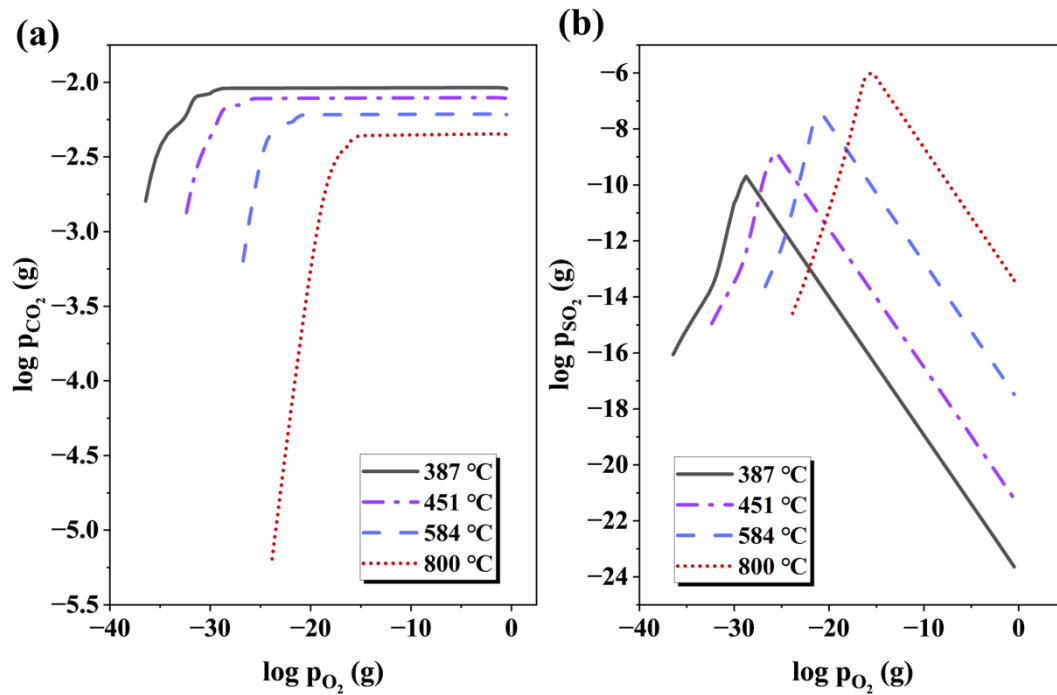

**Fig. S4.** Variation of CO<sub>2</sub> (a) and SO<sub>2</sub> (b) partial pressures in equilibrium calculations of MSO at different oxygen partial pressures and temperatures.

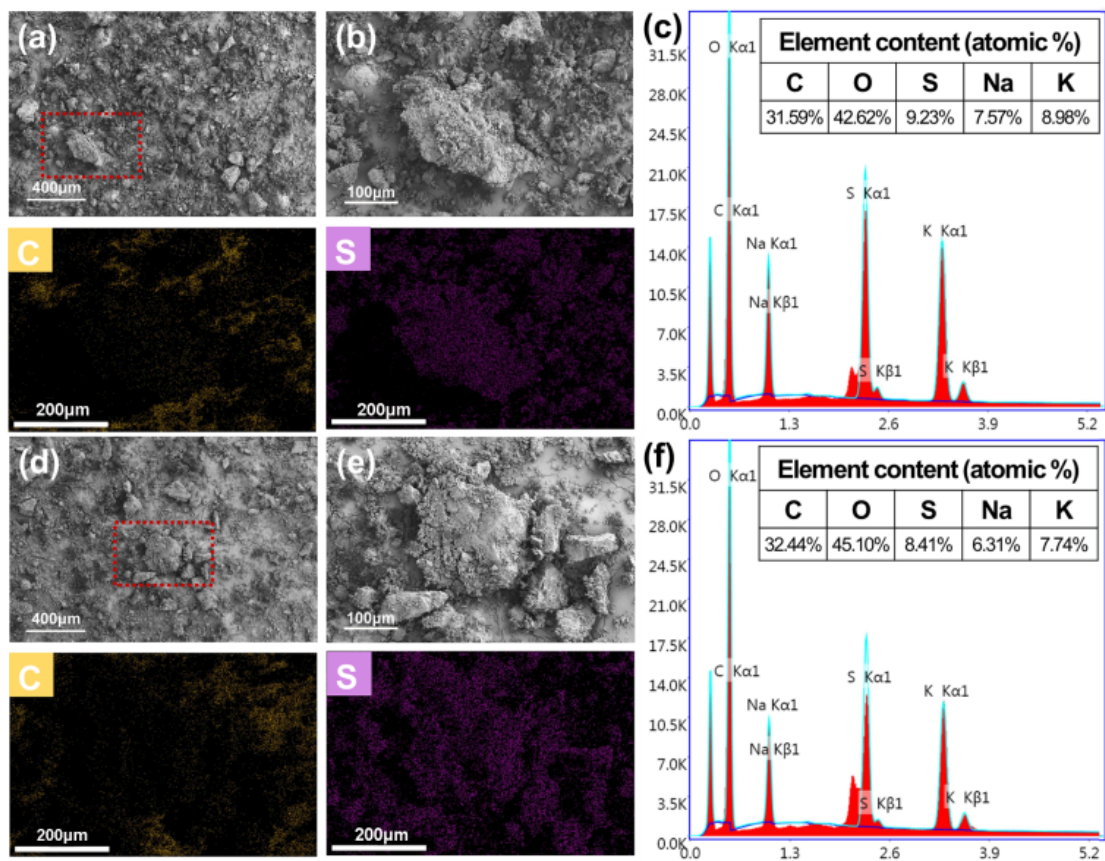

**Fig. S5.** SEM-mapping patterns and elemental analysis results of spent salt collected from MSO-DC (a-c) and MSO-RC (d-f).

## Supporting Tables

**Table S1** The input settings for the equilibrium calculations.

| Species Formula                                                | Feed Temperature°C | Activity Coefficient | Initial Amount (kmol) | 51 Step Add Amount (kmol) |
|----------------------------------------------------------------|--------------------|----------------------|-----------------------|---------------------------|
| <b>Initial Input Phase:</b>                                    |                    |                      |                       |                           |
| C <sub>17</sub> H <sub>29</sub> O <sub>14</sub> S <sub>2</sub> | 25                 | 1                    | 0.1924                | 0.0000                    |
| Na <sub>2</sub> CO <sub>3</sub>                                | 25                 | 1                    | 0.3000                | 0.0000                    |
| Li <sub>2</sub> CO <sub>3</sub>                                | 25                 | 1                    | 0.4400                | 0.0000                    |
| K <sub>2</sub> CO <sub>3</sub>                                 | 25                 | 1                    | 0.2600                | 0.0000                    |
| <b>Gas Products:</b>                                           |                    |                      |                       |                           |
| O <sub>2</sub> (g)                                             | 0                  | 1                    | 0.0000                | 0.1443                    |
| CO (g)                                                         | 0                  | 1                    | 0.0000                | 0.0000                    |
| CO <sub>2</sub> (g)                                            | 0                  | 1                    | 0.0000                | 0.0000                    |
| H <sub>2</sub> (g)                                             | 0                  | 1                    | 0.0000                | 0.0000                    |
| SO <sub>2</sub> (g)                                            | 0                  | 1                    | 0.0000                | 0.0000                    |
| H <sub>2</sub> S (g)                                           | 0                  | 1                    | 0.0000                | 0.0000                    |
| H <sub>2</sub> O (g)                                           | 0                  | 1                    | 0.0000                | 0.0000                    |
| CH <sub>4</sub> (g)                                            | 0                  | 1                    | 0.0000                | 0.0000                    |
| C <sub>2</sub> H <sub>4</sub> (g)                              | 0                  | 1                    | 0.0000                | 0.0000                    |
| C <sub>2</sub> H <sub>6</sub> (g)                              | 0                  | 1                    | 0.0000                | 0.0000                    |
| <b>Inorganic Salt Products:</b>                                |                    |                      |                       |                           |
| Na <sub>2</sub> SO <sub>4</sub>                                | 0                  | 1                    | 0.0000                | 0.0000                    |
| K <sub>2</sub> SO <sub>4</sub>                                 | 0                  | 1                    | 0.0000                | 0.0000                    |
| Li <sub>2</sub> SO <sub>4</sub>                                | 0                  | 1                    | 0.0000                | 0.0000                    |
| K <sub>3</sub> Na(SO <sub>4</sub> ) <sub>2</sub>               | 0                  | 1                    | 0.0000                | 0.0000                    |
| Na <sub>2</sub> SO <sub>3</sub>                                | 0                  | 1                    | 0.0000                | 0.0000                    |
| K <sub>2</sub> SO <sub>3</sub>                                 | 0                  | 1                    | 0.0000                | 0.0000                    |
| Li <sub>2</sub> SO <sub>3</sub>                                | 0                  | 1                    | 0.0000                | 0.0000                    |

**Table S2** Equilibrium amounts of components of the molten salt oxidation process at different temperatures when reaching 1.08 ThOD (3.8961 kmol) oxygen content.

| Species Formula                                                | Equilibrium amounts at different temperatures (kmol) |        |        |        |        |
|----------------------------------------------------------------|------------------------------------------------------|--------|--------|--------|--------|
|                                                                | 25 °C                                                | 387 °C | 451 °C | 584 °C | 800 °C |
| <b>Initial Reaction Phase:</b>                                 |                                                      |        |        |        |        |
| C <sub>17</sub> H <sub>29</sub> O <sub>14</sub> S <sub>2</sub> | 0.0000                                               | 0.0000 | 0.0000 | 0.0000 | 0.0000 |
| Na <sub>2</sub> CO <sub>3</sub>                                | 0.1752                                               | 0.1741 | 0.1731 | 0.1690 | 0.1635 |
| Li <sub>2</sub> CO <sub>3</sub>                                | 0.4400                                               | 0.4394 | 0.4388 | 0.4375 | 0.4360 |
| K <sub>2</sub> CO <sub>3</sub>                                 | 0.0000                                               | 0.0016 | 0.0033 | 0.0088 | 0.0197 |
| <b>Gas Products:</b>                                           |                                                      |        |        |        |        |
| O <sub>2</sub> (g)                                             | 0.0519                                               | 0.0519 | 0.0519 | 0.0519 | 0.0519 |
| CO (g)                                                         | 0.0000                                               | 0.0000 | 0.0000 | 0.0000 | 0.0000 |
| CO <sub>2</sub> (g)                                            | 3.6556                                               | 3.6556 | 3.6556 | 3.6556 | 3.6556 |
| H <sub>2</sub> (g)                                             | 0.0000                                               | 0.0000 | 0.0000 | 0.0000 | 0.0000 |
| SO <sub>2</sub> (g)                                            | 0.0000                                               | 0.0000 | 0.0000 | 0.0000 | 0.0000 |
| H <sub>2</sub> S (g)                                           | 0.0000                                               | 0.0000 | 0.0000 | 0.0000 | 0.0000 |
| COS(g)                                                         | 0.0000                                               | 0.0000 | 0.0000 | 0.0000 | 0.0000 |
| H <sub>2</sub> O (g)                                           | 2.7898                                               | 2.7898 | 2.7898 | 2.7898 | 2.7898 |
| CH <sub>4</sub> (g)                                            | 0.0000                                               | 0.0000 | 0.0000 | 0.0000 | 0.0000 |
| C <sub>2</sub> H <sub>4</sub> (g)                              | 0.0000                                               | 0.0000 | 0.0000 | 0.0000 | 0.0000 |
| C <sub>2</sub> H <sub>6</sub> (g)                              | 0.0000                                               | 0.0000 | 0.0000 | 0.0000 | 0.0000 |
| <b>Inorganic Salt Products:</b>                                |                                                      |        |        |        |        |
| Na <sub>2</sub> SO <sub>4</sub>                                | 0.1248                                               | 0.1259 | 0.1269 | 0.1310 | 0.1365 |
| K <sub>2</sub> SO <sub>4</sub>                                 | 0.2600                                               | 0.2584 | 0.2567 | 0.2512 | 0.2403 |
| Li <sub>2</sub> SO <sub>4</sub>                                | 0.0000                                               | 0.0006 | 0.0012 | 0.0025 | 0.0040 |
| K <sub>3</sub> Na(SO <sub>4</sub> ) <sub>2</sub>               | 0.0000                                               | 0.0000 | 0.0000 | 0.0000 | 0.0000 |
| Na <sub>2</sub> SO <sub>3</sub>                                | 0.0000                                               | 0.0000 | 0.0000 | 0.0000 | 0.0000 |
| K <sub>2</sub> SO <sub>3</sub>                                 | 0.0000                                               | 0.0000 | 0.0000 | 0.0000 | 0.0000 |
| Li <sub>2</sub> SO <sub>3</sub>                                | 0.0000                                               | 0.0000 | 0.0000 | 0.0000 | 0.0000 |

**Table S3** Key parameters of unit for pyrolysis and MSO-RC processes.

| <b>Impact Category</b>               | <b>Units</b>             | <b>Pyrolysis<br/>Values</b> | <b>MSO-RC<br/>Values</b> |
|--------------------------------------|--------------------------|-----------------------------|--------------------------|
| Global warming                       | kg CO <sub>2</sub> eq    | 765                         | 402                      |
| Stratospheric ozone depletion        | kg CFC11 eq              | 0.000474                    | 0.000246                 |
| Ionizing radiation                   | kBq Co-60<br>eq          | $1.26 \times 10^{11}$       | $2.80 \times 10^3$       |
| Ozone formation, Human               | kg NO <sub>x</sub> eq    | 2.65                        | 1.38                     |
| Fine particulate matter<br>formation | kg PM2.5 eq              | 2.32                        | 1.11                     |
| Ozone formation, Terrestrial         | kg NO <sub>x</sub> eq    | 2.66                        | 1.38                     |
| Terrestrial acidification            | kg SO <sub>2</sub> eq    | 6.39                        | 2.99                     |
| Freshwater eutrophication            | kg P eq                  | 0.127                       | 0.0687                   |
| Marine eutrophication                | kg N eq                  | 0.00805                     | 0.00439                  |
| Terrestrial ecotoxicity              | kg 1,4-DCB               | 362                         | 206                      |
| Freshwater ecotoxicity               | kg 1,4-DCB               | 6.12                        | 3.51                     |
| Marine ecotoxicity                   | kg 1,4-DCB               | 8.58                        | 4.89                     |
| Human carcinogenic toxicity          | kg 1,4-DCB               | 23.4                        | 12.5                     |
| Human non-carcinogenic<br>toxicity   | kg 1,4-DCB               | 142                         | 79.1                     |
| Land use                             | m <sup>2</sup> a crop eq | 9.14                        | 4.98                     |
| Mineral resource scarcity            | kg Cu eq                 | 0.16                        | 0.184                    |
| Fossil resource scarcity             | kg oil eq                | 138                         | 72.5                     |
| Water consumption                    | m <sup>3</sup>           | 4.27                        | 2.28                     |
